# Supplementary material for: Determining the site of reduction of 4-NO2-2,2′-bipyridine and [Pt(4-NO2-2,2′-bipyridine)Cl2]
Source: Royal Society of Chemistry journal article supplement (doi:10.1039/b923171d), 2010-01-01
Supplement: b923171d.pdf [file b923171d.pdf]

## Determining the Site of Reduction of 4-NO<sub>2</sub>-2,2'-bipyridine and [Pt(4-NO<sub>2</sub>-2,2'-bipyridine)Cl<sub>2</sub>]

Paul Murray,<sup>\*a</sup> Lorna Jack,<sup>a</sup> Eric J. L. McInnes<sup>b</sup> and Lesley J. Yellowlees<sup>a</sup>

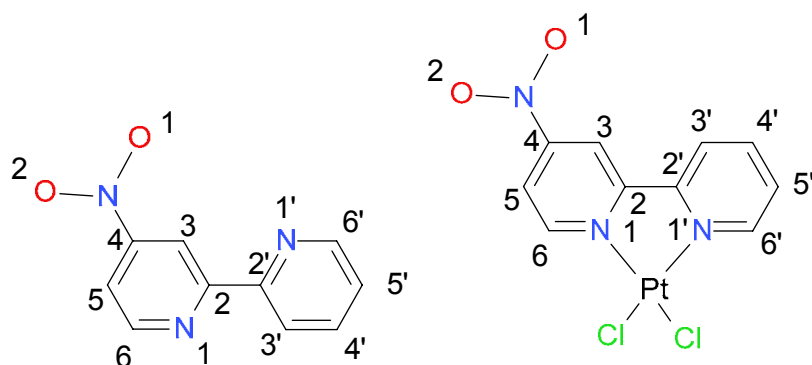

### Calculated Bond Lengths

|         | 4-NO <sub>2</sub> -bpy<br>/Å | [4-NO <sub>2</sub> -bpy] <sup>1-</sup><br>/Å | [Pt(4-NO <sub>2</sub> -bpy)]<br>/Å | [Pt(4-NO <sub>2</sub> -bpy)] <sup>1-</sup><br>/Å | [Pt(4-NO <sub>2</sub> -bpy)] <sup>2-</sup><br>/Å |
|---------|------------------------------|----------------------------------------------|------------------------------------|--------------------------------------------------|--------------------------------------------------|
| N1-C2   | 1.3                          | 1.4                                          | 1.4                                | 1.4                                              | 1.4                                              |
| C2-C3   | 1.4                          | 1.4                                          | 1.4                                | 1.4                                              | 1.4                                              |
| C3-C4   | 1.4                          | 1.4                                          | 1.4                                | 1.4                                              | 1.4                                              |
| C4-C5   | 1.4                          | 1.4                                          | 1.5                                | 1.4                                              | 1.5                                              |
| C5-C6   | 1.4                          | 1.4                                          | 1.4                                | 1.4                                              | 1.4                                              |
| C6-N1   | 1.3                          | 1.3                                          | 1.4                                | 1.4                                              | 1.4                                              |
| C3-H3   | 1.1                          | 1.1                                          | 1.1                                | 1.1                                              | 1.1                                              |
| C4-N4   | 1.5                          | 1.4                                          | 1.4                                | 1.4                                              | 1.4                                              |
| N4-O1   | 1.2                          | 1.3                                          | 1.3                                | 1.3                                              | 1.3                                              |
| N4-O2   | 1.2                          | 1.3                                          | 1.3                                | 1.3                                              | 1.3                                              |
| C5-H5   | 1.1                          | 1.1                                          | 1.1                                | 1.1                                              | 1.1                                              |
| C6-H6   | 1.1                          | 1.1                                          | 1.1                                | 1.1                                              | 1.1                                              |
| C2-C2'  | 1.4                          | 1.5                                          | 1.4                                | 1.5                                              | 1.4                                              |
| N1'-C2' | 1.3                          | 1.4                                          | 1.4                                | 1.4                                              | 1.4                                              |
| C2'-C3' | 1.4                          | 1.4                                          | 1.4                                | 1.4                                              | 1.4                                              |
| C3'-C4' | 1.4                          | 1.4                                          | 1.4                                | 1.4                                              | 1.4                                              |
| C4'-C5' | 1.4                          | 1.4                                          | 1.4                                | 1.4                                              | 1.4                                              |
| C5'-C6' | 1.4                          | 1.4                                          | 1.4                                | 1.4                                              | 1.4                                              |
| C6'-N1' | 1.3                          | 1.3                                          | 1.3                                | 1.3                                              | 1.3                                              |
| C3'-H3' | 1.1                          | 1.1                                          | 1.1                                | 1.1                                              | 1.1                                              |
| C4'-H4' | 1.1                          | 1.1                                          | 1.1                                | 1.1                                              | 1.1                                              |
| C5'-H5' | 1.1                          | 1.1                                          | 1.1                                | 1.1                                              | 1.1                                              |
| C6'-H6' | 1.1                          | 1.1                                          | 1.1                                | 1.1                                              | 1.1                                              |
| Pt-N1   | -                            | -                                            | 2.0                                | 2.0                                              | 2.0                                              |
| Pt-N1'  | -                            | -                                            | 2.0                                | 2.0                                              | 2.0                                              |
| Pt-Cl1  | -                            | -                                            | 2.4                                | 2.4                                              | 2.4                                              |
| Pt-Cl2  | -                            | -                                            | 2.4                                | 2.4                                              | 2.4                                              |

**Calculated Bond Angles**

|             | 4-NO <sub>2</sub> -bpy<br>/° | [4-NO <sub>2</sub> -bpy] <sup>1-</sup><br>/° | [Pt(4-NO <sub>2</sub> -bpy)]<br>/° | [Pt(4-NO <sub>2</sub> -bpy)] <sup>1-</sup><br>/° | [Pt(4-NO <sub>2</sub> -bpy)] <sup>2-</sup><br>/° |
|-------------|------------------------------|----------------------------------------------|------------------------------------|--------------------------------------------------|--------------------------------------------------|
| N1-C2-C3    | 122.3                        | 123.6                                        | 120.9                              | 121.4                                            | 121.0                                            |
| C2-C3-C4    | 117.3                        | 119.1                                        | 118.2                              | 119.8                                            | 121.1                                            |
| C3-C4-C5    | 121.6                        | 117.8                                        | 121.2                              | 118.6                                            | 117.4                                            |
| C4-C5-C6    | 116.4                        | 118.0                                        | 117.6                              | 118.7                                            | 118.6                                            |
| C5-C6-N1    | 123.8                        | 125.4                                        | 122.1                              | 123.1                                            | 124.2                                            |
| C6-N1-C2    | 118.8                        | 116.1                                        | 120.0                              | 118.5                                            | 117.7                                            |
| N1-C2-C2'   | 117.4                        | 115.9                                        | 114.9                              | 114.7                                            | 115.3                                            |
| C3-C2-C2'   | 120.3                        | 120.6                                        | 124.2                              | 123.8                                            | 123.7                                            |
| C2-C3-H3    | 120.7                        | 121.0                                        | 122.3                              | 122.1                                            | 121.1                                            |
| H3-C3-C4    | 122.0                        | 119.9                                        | 119.4                              | 118.2                                            | 117.7                                            |
| C3-C4-N4    | 119.3                        | 121.1                                        | 119.0                              | 119.9                                            | 120.2                                            |
| N4-C4-C5    | 119.1                        | 121.1                                        | 119.8                              | 121.5                                            | 122.4                                            |
| C4-N4-O1    | 117.7                        | 118.4                                        | 117.2                              | 118.8                                            | 120.5                                            |
| C4-N4-O2    | 117.3                        | 119.3                                        | 117.1                              | 118.1                                            | 118.5                                            |
| O1-N4-O2    | 125.0                        | 122.3                                        | 125.6                              | 123.1                                            | 121.0                                            |
| C4-C5-H5    | 121.3                        | 119.8                                        | 121.2                              | 120.1                                            | 120.0                                            |
| H5-C5-C6    | 122.3                        | 122.2                                        | 121.2                              | 121.2                                            | 121.4                                            |
| C5-C6-H6    | 120.1                        | 119.3                                        | 123.1                              | 122.3                                            | 121.6                                            |
| H6-C6-N1    | 116.2                        | 115.4                                        | 114.9                              | 114.6                                            | 114.2                                            |
| N1'-C2'-C3' | 122.6                        | 121.2                                        | 121.0                              | 120.0                                            | 118.9                                            |
| C2'-C3'-C4' | 118.6                        | 119.4                                        | 119.4                              | 120.0                                            | 121.0                                            |
| C3'-C4'-C5' | 119.0                        | 119.2                                        | 118.9                              | 119.0                                            | 118.9                                            |
| C4'-C5'-C6' | 118.2                        | 117.5                                        | 119.3                              | 118.9                                            | 118.4                                            |
| C5'-C6'-N1' | 123.4                        | 117.5                                        | 121.7                              | 122.2                                            | 123.1                                            |
| C6'-N1'-C2' | 118.2                        | 118.6                                        | 119.8                              | 119.9                                            | 119.6                                            |
| N1'-C2'-C2  | 116.5                        | 118.6                                        | 114.6                              | 115.0                                            | 114.8                                            |
| C3'-C2'-C2  | 120.9                        | 120.2                                        | 124.5                              | 125.0                                            | 126.2                                            |
| C2'-C3'-H3' | 119.5                        | 118.3                                        | 120.4                              | 119.5                                            | 118.7                                            |
| H3'-C3'-C4' | 121.9                        | 122.4                                        | 120.2                              | 120.5                                            | 120.4                                            |
| C3'-C4'-H4' | 120.3                        | 120.3                                        | 120.2                              | 120.1                                            | 120.2                                            |
| H4'-C4'-C5' | 120.7                        | 120.6                                        | 120.9                              | 120.8                                            | 120.9                                            |
| C4'-C5'-H5' | 121.5                        | 121.9                                        | 121.5                              | 121.7                                            | 122.0                                            |
| H5'-C5'-C6' | 120.3                        | 120.7                                        | 119.2                              | 119.4                                            | 119.6                                            |
| C5'-C6'-H6' | 120.6                        | 120.2                                        | 123.4                              | 123.3                                            | 122.6                                            |
| H6'-C6'-N1' | 116.0                        | 115.8                                        | 114.0                              | 114.6                                            | 114.3                                            |
| C2-N1-Pt    | -                            | -                                            | 115.2                              | 114.8                                            | 114.3                                            |
| C6-N1-Pt    | -                            | -                                            | 124.9                              | 126.7                                            | 128.0                                            |
| C2'-N1'-Pt  | -                            | -                                            | 115.0                              | 115.1                                            | 114.8                                            |
| C6'-N1'-Pt  | -                            | -                                            | 125.2                              | 125.0                                            | 125.6                                            |
| N1-Pt-N1'   | -                            | -                                            | 94.9                               | 80.4                                             | 80.7                                             |
| N1-Pt-Cl1   | -                            | -                                            | 89.9                               | 95.1                                             | 95.4                                             |
| Cl-Pt-Cl'   | -                            | -                                            | 89.8                               | 89.7                                             | 89.1                                             |
| N1'-Pt-Cl'  | -                            | -                                            | 94.9                               | 94.7                                             | 94.7                                             |

**Calculated Energies and Molecular Orbitals**4-NO<sub>2</sub>-bpy

Total energy = -699.9225357 Hartrees

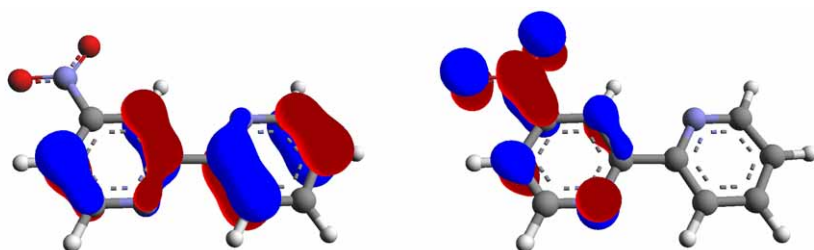

HOMO (left) and LUMO (right) of 4-NO<sub>2</sub>-bpy, energies = -0.26460 and -0.11874 Hartrees respectively

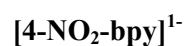

Total energy = -699.985228 Hartrees

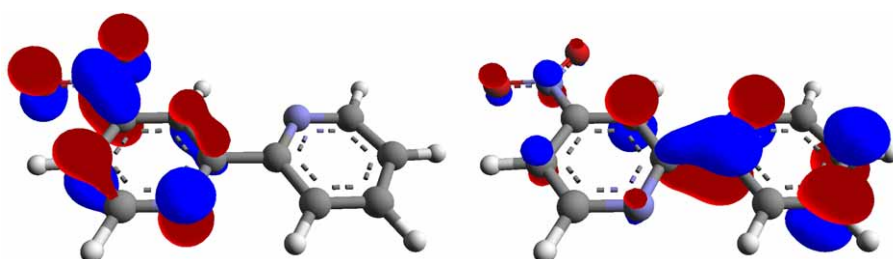

SOMO (left) and LUMO (right) of [4-NO<sub>2</sub>-bpy]<sup>1-</sup>, energies = -0.00796 and 0.05240 Hartrees respectively

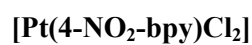

Total energy = -1739.2490721 Hartrees

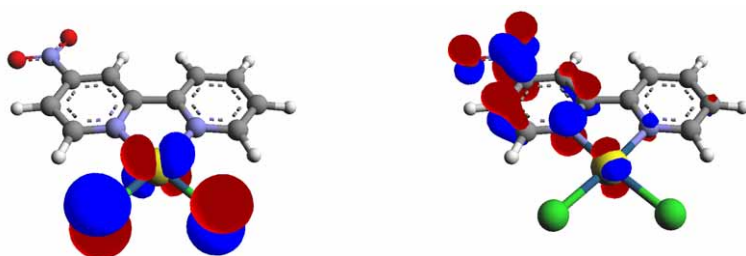

HOMO (left) and LUMO (right) of [Pt(4-NO<sub>2</sub>-bpy)Cl<sub>2</sub>], energies = -0.24124 and -0.15411 Hartrees respectively

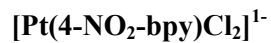

Total energy = -1739.3540944 Hartrees

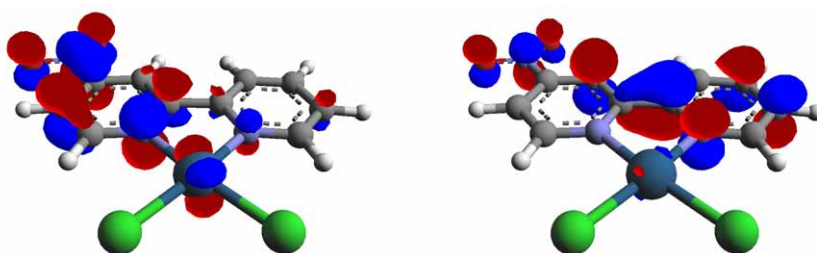

SOMO (left) and LUMO (right) of [Pt(4-NO<sub>2</sub>-bpy)Cl<sub>2</sub>]<sup>1-</sup>, energies = -0.05633 and 0.00253 Hartrees respectively

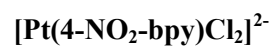

Total energy = -1739.3080975 Hartrees

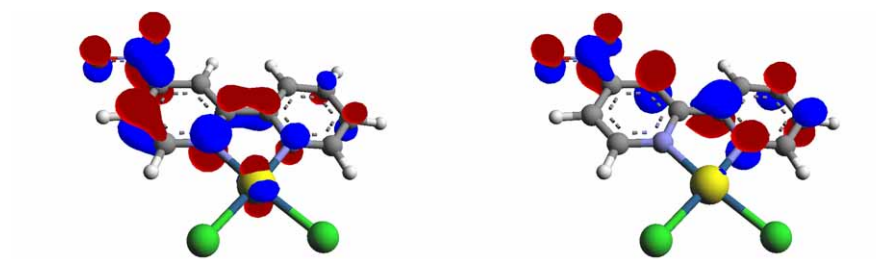

**HOMO (left) and LUMO (right) of [Pt(4-NO<sub>2</sub>-bpy)Cl<sub>2</sub>]<sup>2-</sup>, energies = 0.09085 and 0.13882 Hartrees respectively**
